# Supplementary material
Source: Springer Nature journal article supplement (https://www.springermedizin.de/resource/supplementary/12882_2013_772_MOESM4_ESM.pdf/9454686)

**a** Addition of mixture of fixed P and variable fH

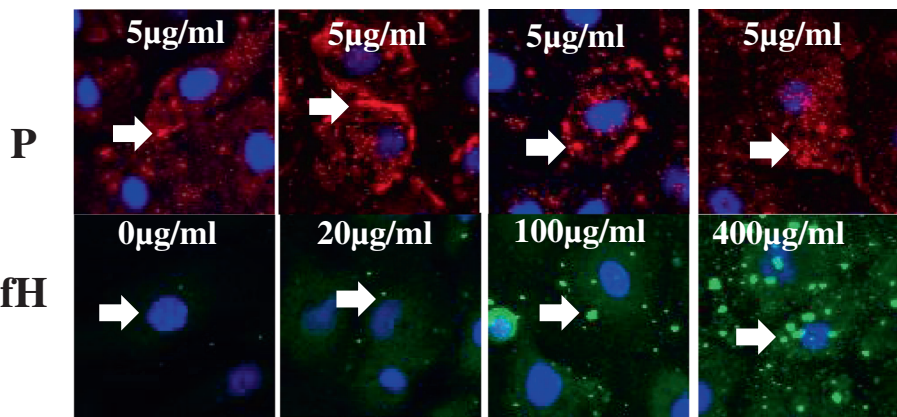

**b** Addition of mixture of fixed fH and variable P

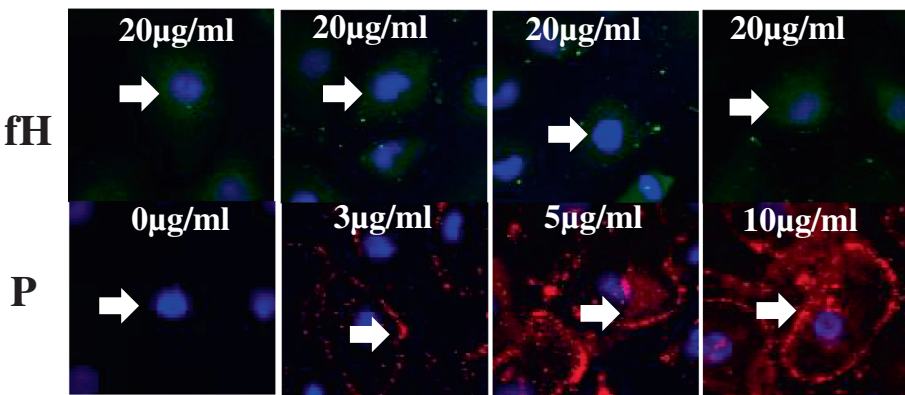

Supplement: MOESM4 [file 9454686]
